# Supplementary material
Source: PubMed Central journal article supplement (PMC7267556)

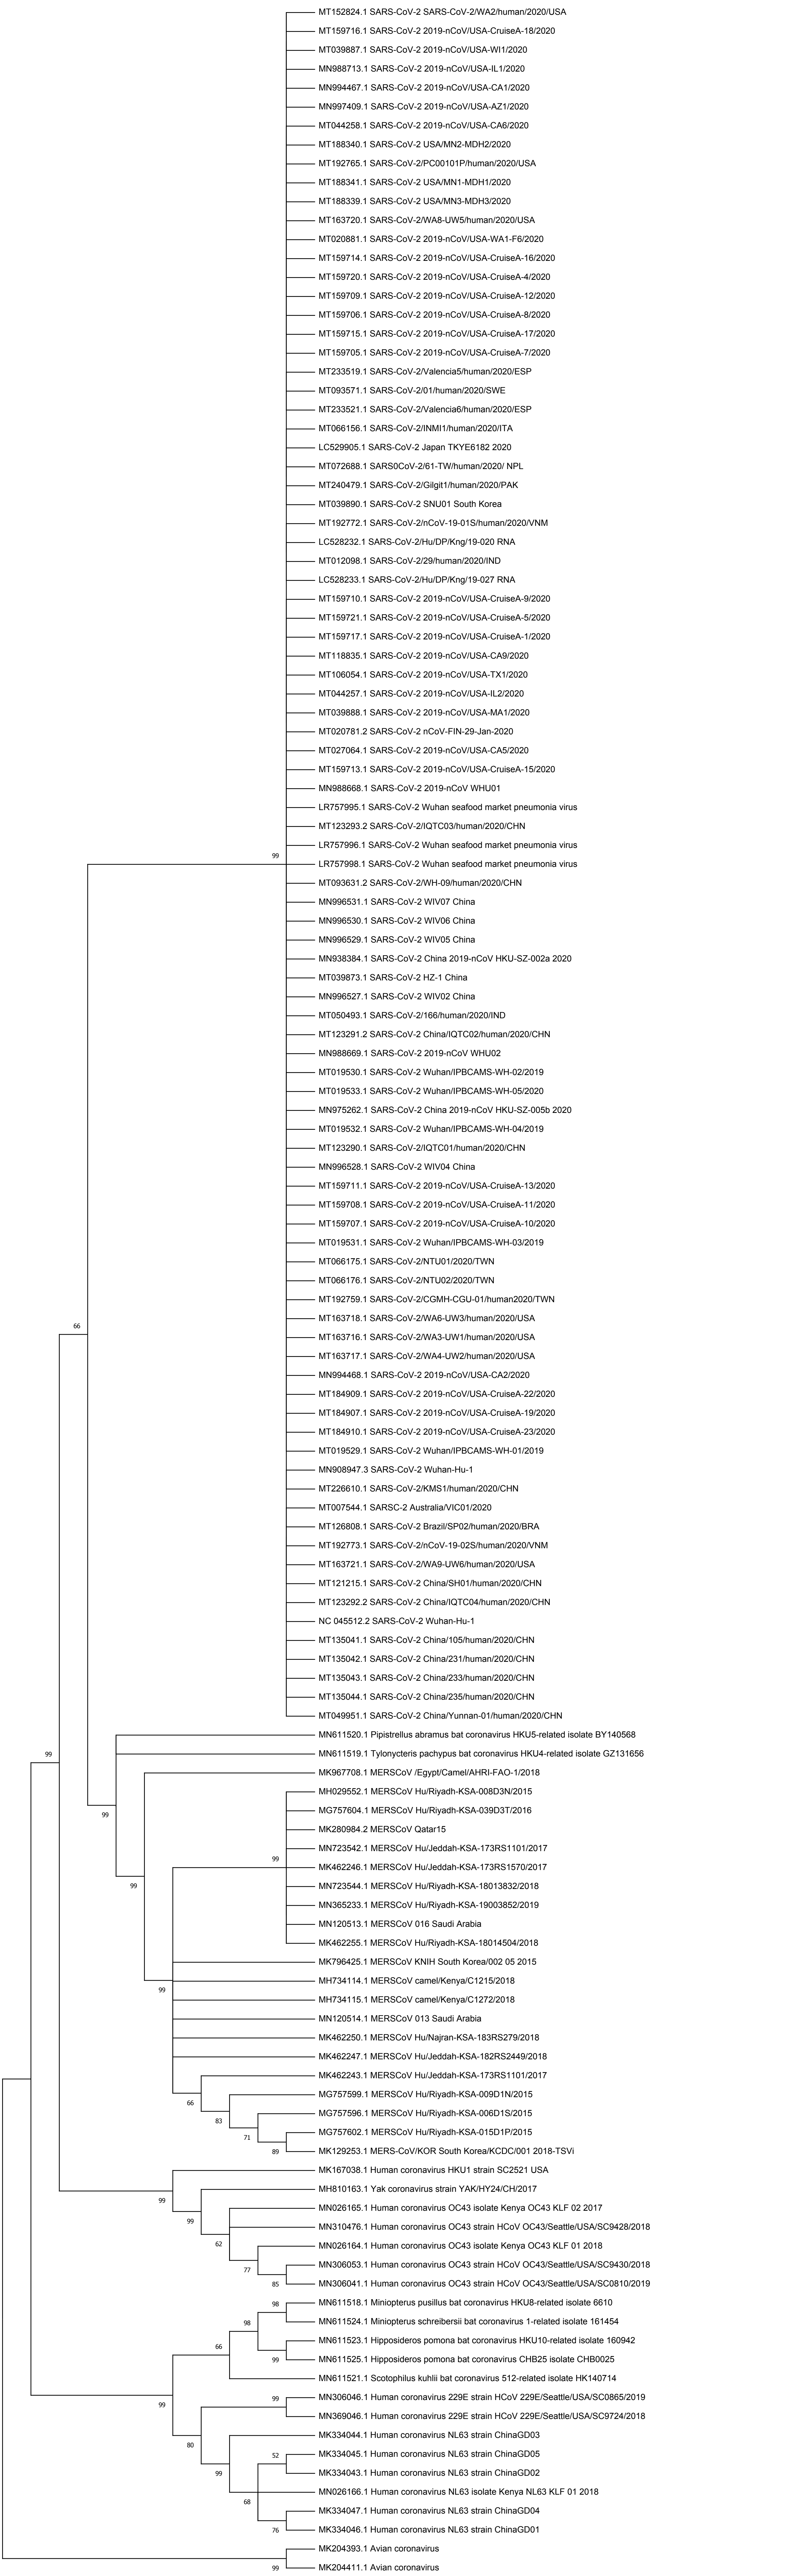

Supplement: JMV-92-1690-s002.pdf [file JMV-92-1690-s002.pdf]
